# Supplementary material for: Specially Designed Polyaniline/Polypyrrole Ink for a Fully Printed Highly Sensitive pH Microsensor
Source: PubMed Central journal article supplement (PMC8397255; doi:10.1021/acsami.1c08043), 2021-07-06
Supplement: am1c08043_si_001.pdf [file am1c08043_si_001.pdf]

# Specially designed polyaniline/polypyrrole ink for a fully printed high sensitive pH microsensor.

Miguel Zea,<sup>†,‡</sup> Robert Texido<sup>§</sup>, Rosa Villa<sup>†,¶</sup>, Salvador Borrós<sup>§</sup> and Gemma Gabriel<sup>†,¶,\*</sup>

<sup>†</sup>Instituto de Microelectrónica de Barcelona IMB-CNM (CSIC), Campus Universitat Autònoma de Barcelona, 08193 Cerdanyola del Vallès, Barcelona, Spain

<sup>‡</sup>PhD in Electrical and Telecommunication Engineering, Universitat Autònoma de Barcelona (UAB)

<sup>§</sup> Grup d'Enginyeria de Materials, Institut Químic de Sarrià-Universitat Ramon Llull, via Augusta 390, 08017 Barcelona, Spain

<sup>¶</sup>CIBER de Bioingeniería, Biomateriales y Nanomedicina (CIBER-BBN)

## AUTHOR INFORMATION

### Corresponding Author

\*E-mail: [gemma.gabriel@imb-cnm.csic.es](mailto:gemma.gabriel@imb-cnm.csic.es)

### Pseudo-reference electrode

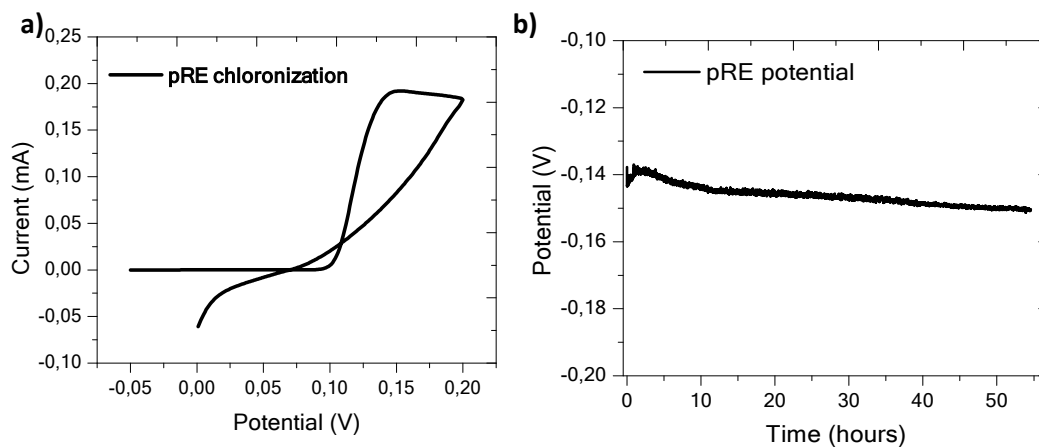

**Figure S1.** a) CV in HCl 0.1 M at a scan rate of 20 mV/s applied for the chlorinated process of the printed Ag electrode, b) Potential stability in KCl (0.1 M) evaluated against a commercial Ag/AgCl reference electrode (RE) of the developed Ag/AgCl pRE over time.

**PANI:PSS and PPy:PSS formulations**

| <b>Formulations</b>                                    |                      |             |
|--------------------------------------------------------|----------------------|-------------|
| PANI:PSS (Mz 70.000)<br>solution diluted 1:1 MQ water  | Triton X100 1.5% v/v |             |
|                                                        | Triton X100 1.5% v/v | DMSO 5% v/v |
|                                                        | Triton X100 1.5% v/v | Gly 5% v/v  |
| PANI:PSS (Mz 200.000)<br>solution diluted 1:1 MQ water | Triton X100 1.5% v/v |             |
|                                                        | Triton X100 1.5% v/v | DMSO 5% v/v |
|                                                        | Triton X100 1.5% v/v | Gly 5% v/v  |
| PPy:PSS (Mz 70.000) solution<br>diluted 1:1 MQ water   | Triton X100 1.5% v/v |             |
|                                                        | Triton X100 1.5% v/v | DMSO 5% v/v |
|                                                        | Triton X100 1.5% v/v | Gly 5% v/v  |
| PPy:PSS (Mz 200.000)<br>solution diluted 1:1 MQ water  | Triton X100 1.5% v/v |             |
|                                                        | Triton X100 1.5% v/v | DMSO 5% v/v |
|                                                        | Triton X100 1.5% v/v | Gly 5% v/v  |

**Table S1.** Formulations of inkjet printing inks obtained from PANI:PSS / PPy:PSS suspensions

## Surface tension of PANI:PSS / PPy:PSS formulations

| Formulations                                           |                                  | mN/m | Standard deviation |
|--------------------------------------------------------|----------------------------------|------|--------------------|
| PANI:PSS (Mz 70.000)<br>solution diluted 1:1 MQ water  | Triton X100 1.5% v/v             | 59,7 | 1,3                |
|                                                        | Triton X100 1.5% v/v DMSO 5% v/v | 59,2 | 1,5                |
|                                                        | Triton X100 1.5% v/v Gly 5% v/v  | 59,3 | 1,8                |
| PANI:PSS (Mz 200.000)<br>solution diluted 1:1 MQ water | Triton X100 1.5% v/v             | 59,7 | 1,2                |
|                                                        | Triton X100 1.5% v/v DMSO 5% v/v | 59,2 | 1,5                |
|                                                        | Triton X100 1.5% v/v Gly 5% v/v  | 59,4 | 2,1                |
| PPy:PSS (Mz 70.000) solution<br>diluted 1:1 MQ water   | Triton X100 1.5% v/v             | 59,7 | 1,2                |
|                                                        | Triton X100 1.5% v/v DMSO 5% v/v | 59,9 | 2,6                |
|                                                        | Triton X100 1.5% v/v Gly 5% v/v  | 59,8 | 1,5                |
| PPy:PSS (Mz 200.000)<br>solution diluted 1:1 MQ water  | Triton X100 1.5% v/v             | 61,4 | 2,8                |
|                                                        | Triton X100 1.5% v/v DMSO 5% v/v | 60,1 | 1,8                |
|                                                        | Triton X100 1.5% v/v Gly 5% v/v  | 59,7 | 1,9                |
| PANI:PSS + PPy:PSS (Mz 70.000)+MQ water (1:1:1)        | Triton X100 1.5% v/v DMSO 5% v/v | 60,5 | 1,6                |

**Table S2.** Surface tension of the formulations of inkjet printing inks obtained from PANI:PSS / PPy:PSS suspensions

### IR spectra characterization

PANI:PSS and PPy:PSS suspension were characterized using FTIR spectra to validate the obtention of the CPs suspension. For PANI, main PANI bands are present in FTIR (Figure S2 a): 1578  $\text{cm}^{-1}$  band correspond to C = C stretching of PANI quinoid groups and 1486  $\text{cm}^{-1}$  C = C stretching of benzenoid groups highlighted in the green bar. Also, it is possible to identify the 1294  $\text{cm}^{-1}$  band of stretching vibration of secondary

amine C – N band and 830  $\text{cm}^{-1}$  band corresponding at C – H out-of -plane deformation vibration of the benzenoid groups<sup>[1]</sup>. The FTIR also presented the sulfonic acid vibration bands at 1138 and 1110  $\text{cm}^{-1}$ , 803  $\text{cm}^{-1}$  band corresponding to out-of-plane bending vibration of the C-H band of p-disubstituted benzene ring and 505  $\text{cm}^{-1}$  band corresponding to –  $\text{SO}_3\text{H}$  group stretch<sup>[1,2]</sup>. These bands confirm the presence of a p – substituted benzene group with sulfonic acid in the PANI microparticles.

IR spectre for PPy:PSS 70.000, revealed the principal bands of both compounds as was expected (Figure S2 b). Typical pyrrole ring vibration bands at 1550 $\text{cm}^{-1}$ , 930 $\text{cm}^{-1}$  and 770  $\text{cm}^{-1}$  along with C – N stretch band (1189  $\text{cm}^{-1}$ ) and 666  $\text{cm}^{-1}$  from primary amine wagging confirms the presence of PPy in the structure<sup>[3,4]</sup>. The FTIR also presented the sulfonic acid vibration bands at 1033 and 1004  $\text{cm}^{-1}$  observed previously in the PANI FTIR (Figure S2 a) confirming the presence of the polyelectrolyte<sup>[1,2]</sup>.

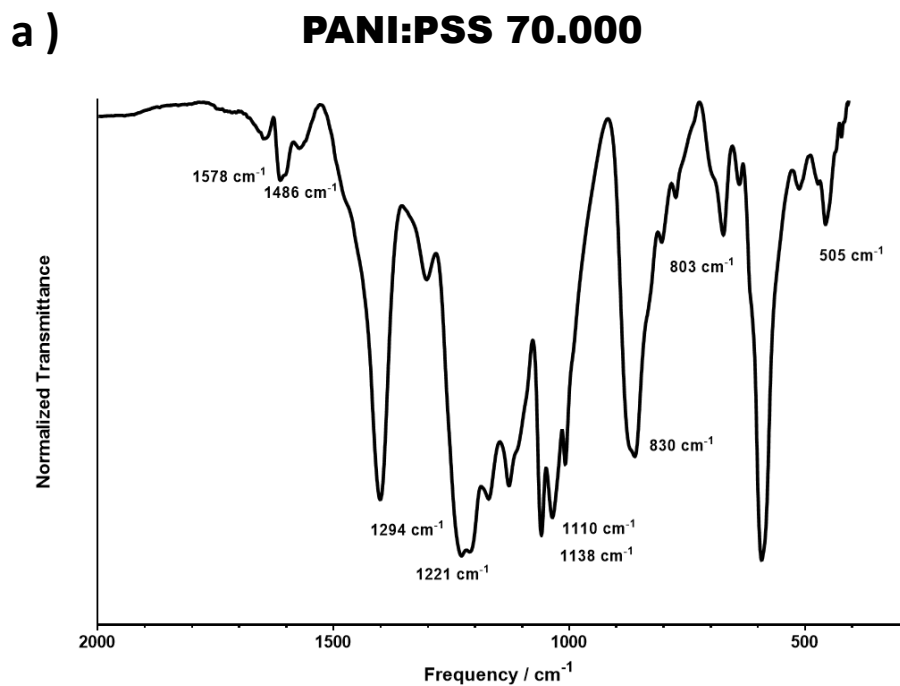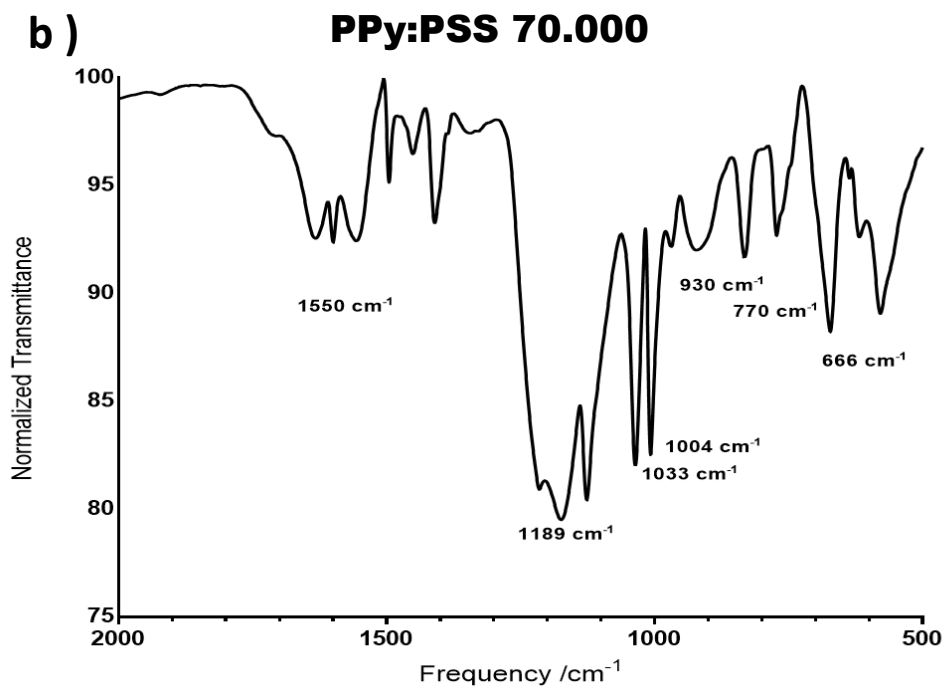

Figure S2. FTIR spectra of PANI:PSS Mw 70.000 (a) and PPy:PSS Mw 70.000 (b).

### CP suspensions – pH dependence

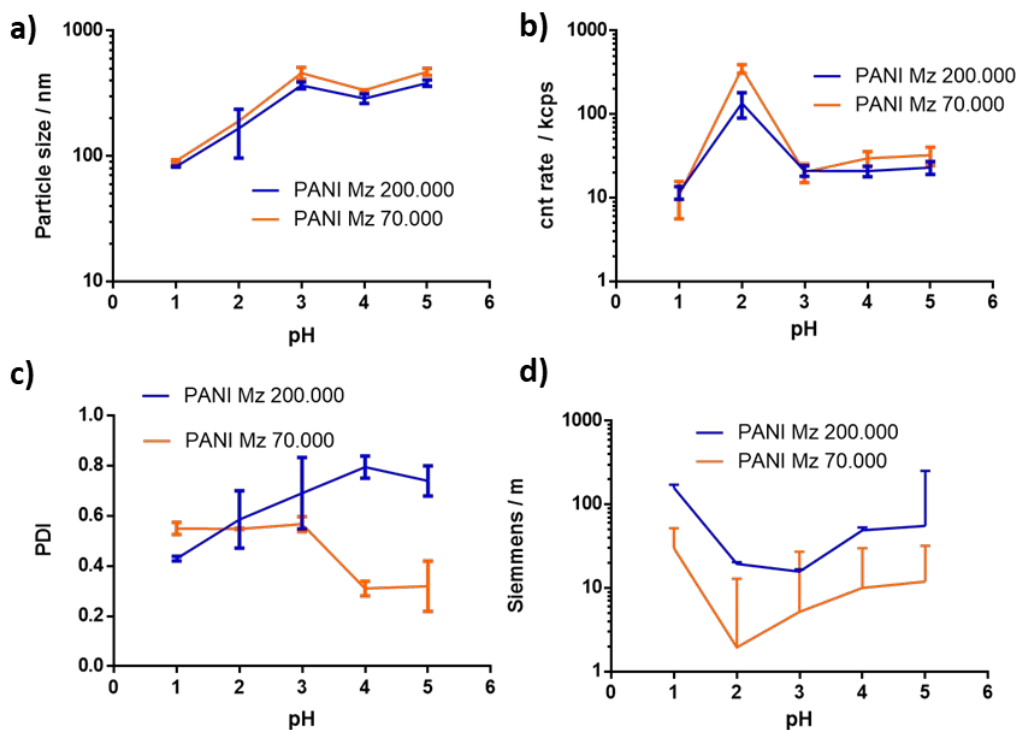

**Figure S3.** Effect of the pH of the synthesis media on PANI:PSS suspension parameters: Particle size mean (a), count rate of the DLS measurement, indicating number of particles in media (b), Polydispersity of the suspensions (c) and conductivity of the obtained film (d).

## DLS characterization

### a) PANI:PSS 70.000

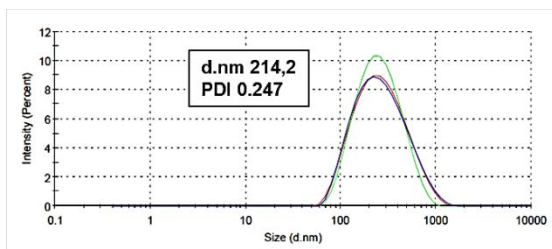

### b) PANI:PSS 200.000

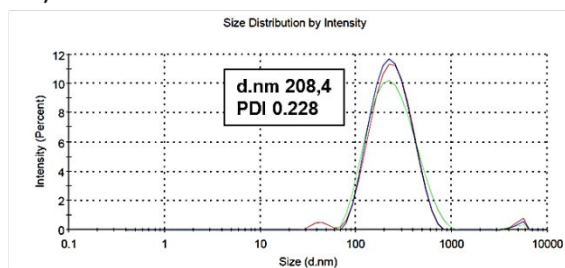

### c) PPy:PSS 70.000

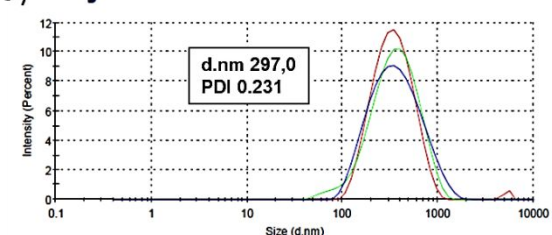

### d) PPy:PSS 200.000

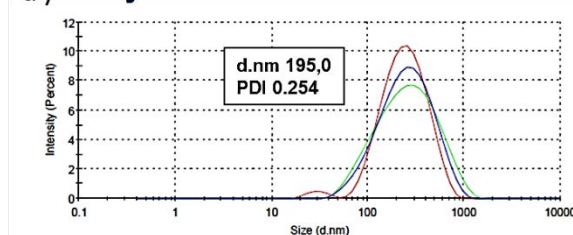

Figure S4. Particle size distribution profile obtained through DLS for CP suspensions after its synthesis: PANI:PSS with PSS molecular weight of Mw 70.000 and 200.000 (a and b) and PPy:PSS with a Mw of 70.000 and 200.000 (c and d).

## Zeta potential characterization

### a) PANI:PSS 70.000

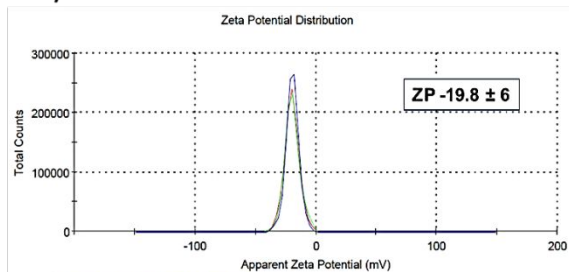

### b) PANI:PSS 200.000

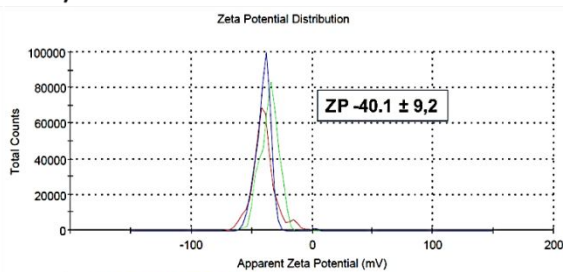

### c) PPy:PSS 70.000

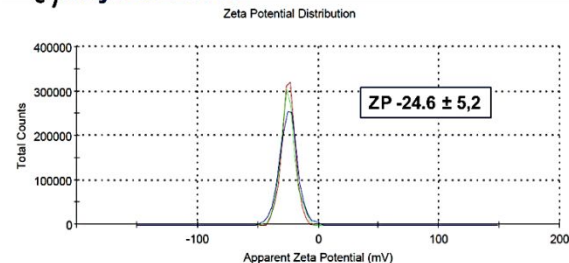

### d) PPy:PSS 200.000

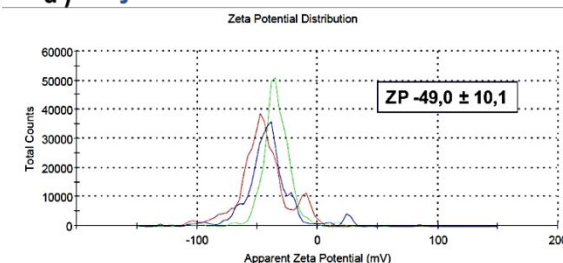

**Figure S5.** Zeta potential profile obtained through DLS for CP suspensions after its synthesis: PANI:PSS with PSS molecular weight of Mw 70.000 and 200.000 (a and b) and PPy:PSS with a Mw of 70.000 and 200.000 (c and d).

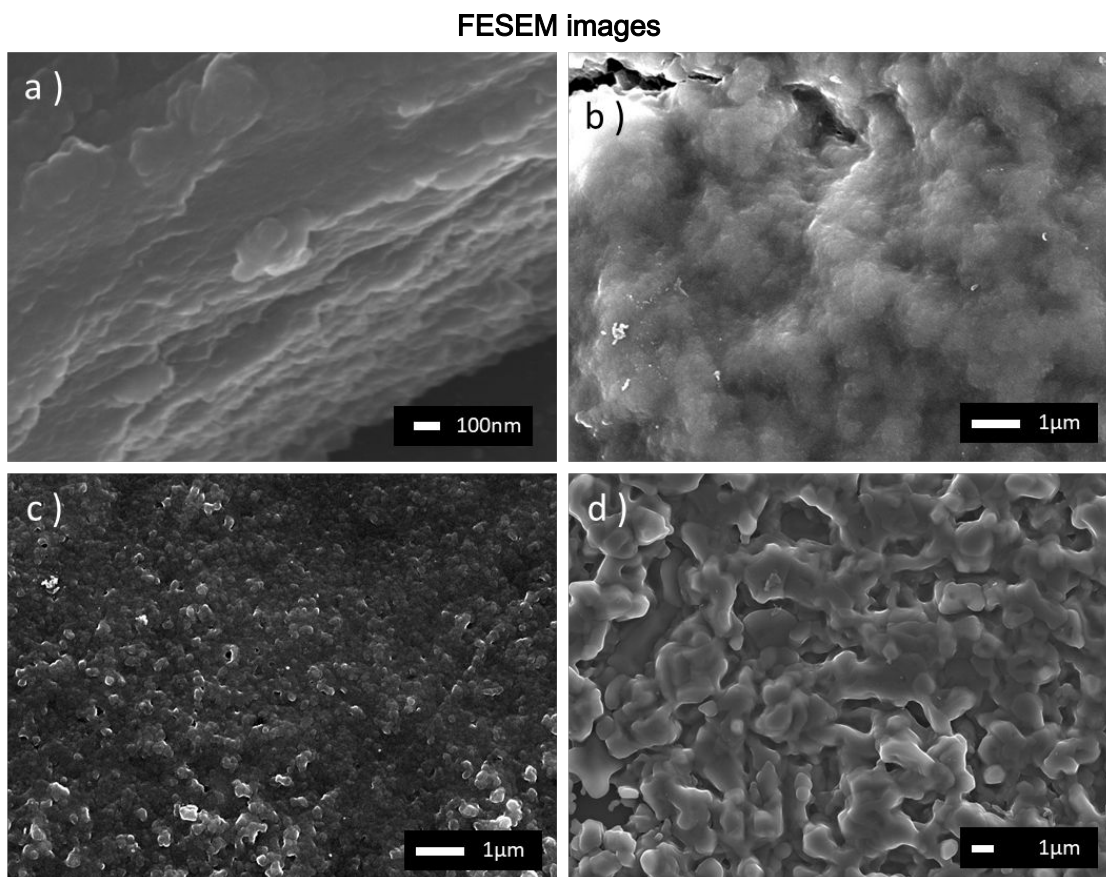

**Figure S6.** FESEM images of CP suspension films: a) PANI:PSS Mz 70.000, b) PANI:PSS Mz 200.000, c) PPy:PSS Mz 70.000 and d) PPy:PSS Mz 200.000.

### **Inkjet Printing fabrication**

Waveform was develop to fine-tune the drop ejection of the inkjet printheads.



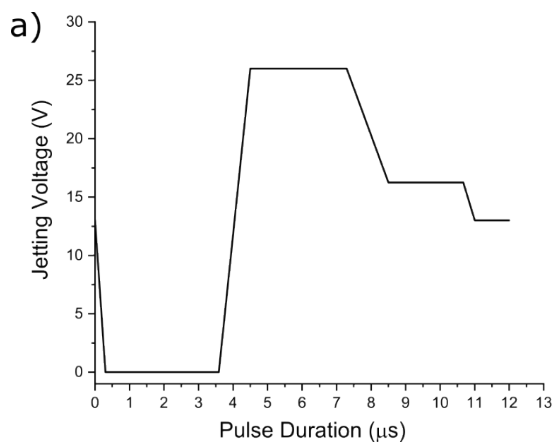

b)

|                                      |                                               |
|--------------------------------------|-----------------------------------------------|
| <b>Print resolution / Drop space</b> | <b>2540 dpi / 10 <math>\mu\text{m}</math></b> |
| Maximum jetting frequency            | 5 KHz                                         |
| <b>Maximum Jetting Voltage</b>       | <b>26 V</b>                                   |
| Maximum number of Nozzles            | 15                                            |

**Figure S7.** Optimized waveform and parameters applied to the piezoelectric transducer of the printhead for the CP inks printing developed to fine-tune the drop ejection of the inkjet printhead.

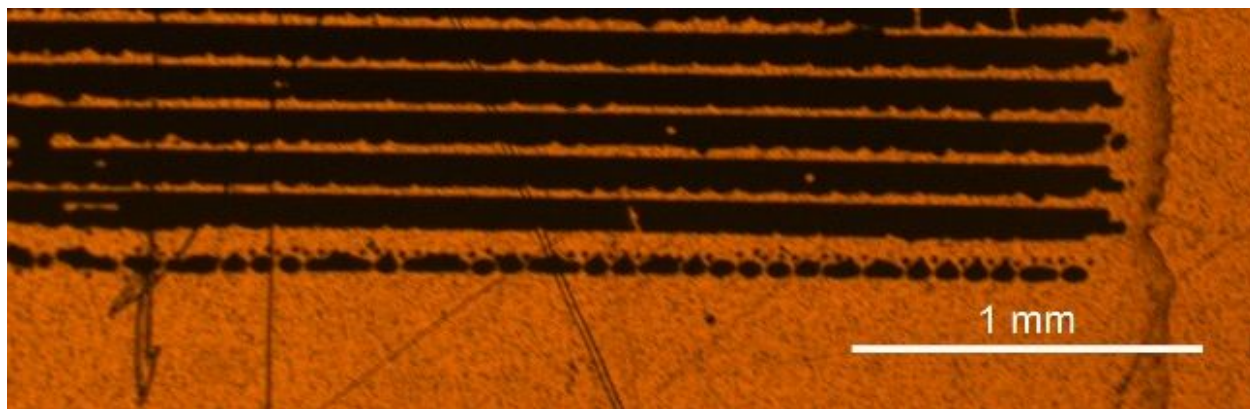

**Figure S8.** Image of a square printed at DS 10  $\mu\text{m}$ . This DS or higher do not allow the overlap of contiguous printed lines.

**Non-adherence of polymeric film**

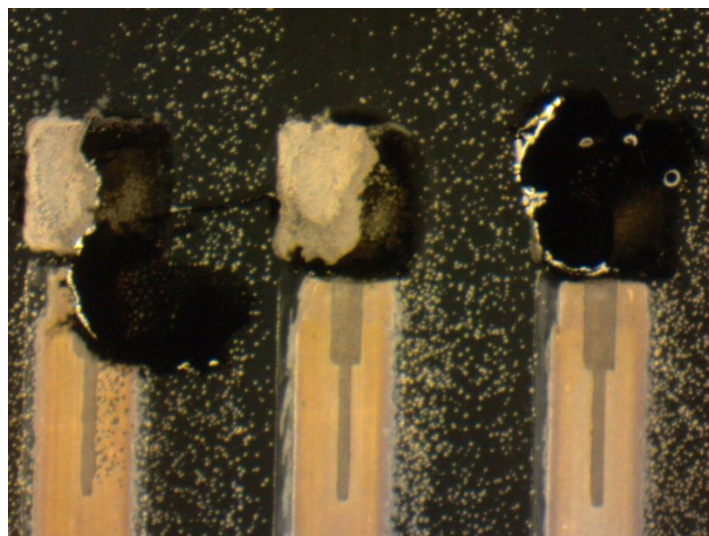

**Figure S9.** Four layers (4L) of the printed CP produce films that are completely detached when being immersed in an aqueous solution due to an excess of material over the metallic electrode.

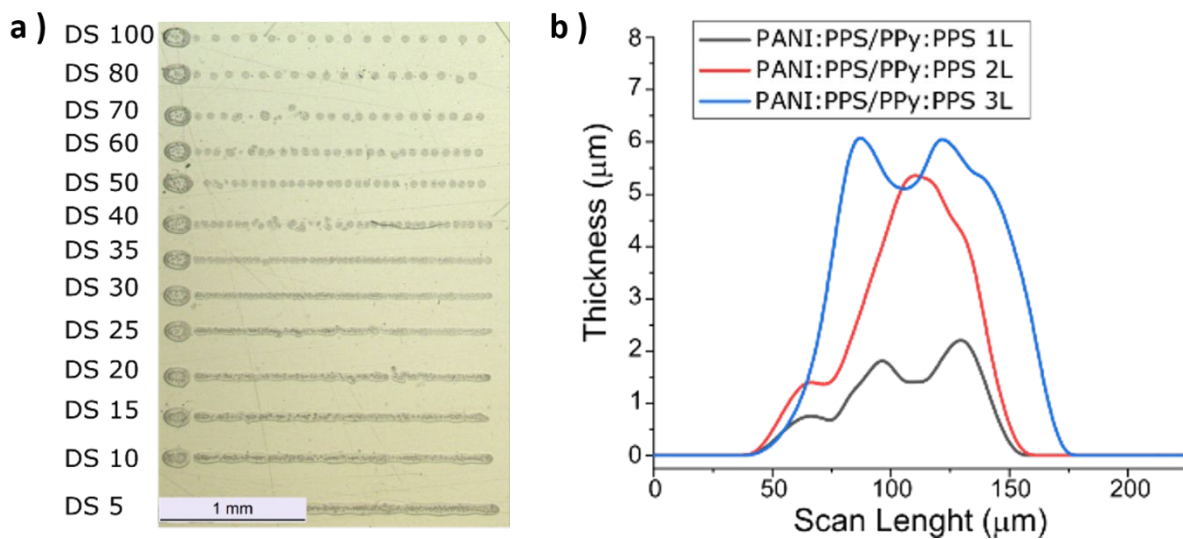

**Figure S10.** a) Line pattern printed on PEN substrate for PANI:PSS/PPy:PSS specially formulated ink and b) the cross-section profiles for 1L, 2L and 3L.



| Volts |             |             |             |            |
|-------|-------------|-------------|-------------|------------|
| pH    | Electrode 1 | Electrode 2 | Electrode 3 | CV (%)     |
| 10    | -0,11235    | -0,11098    | -0,11123    | 0,65642434 |
| 9     | -0,03994    | -0,03894    | -0,03888    | 1,52130896 |
| 8     | 0,07205     | 0,07296     | 0,07307     | 0,77200719 |
| 7     | 0,15627     | 0,15694     | 0,15701     | 0,26191204 |
| 6     | 0,23104     | 0,23081     | 0,23082     | 0,05691322 |
| 5     | 0,29630     | 0,29583     | 0,29582     | 0,09317697 |
| 4     | 0,37870     | 0,37715     | 0,37714     | 0,23830115 |
| 3     | 0,45789     | 0,45899     | 0,45800     | 0,13207177 |

**Table S3.** Variation coefficient of calibration in figure 6 with the PANI:PSS/PPy:PSS ink.

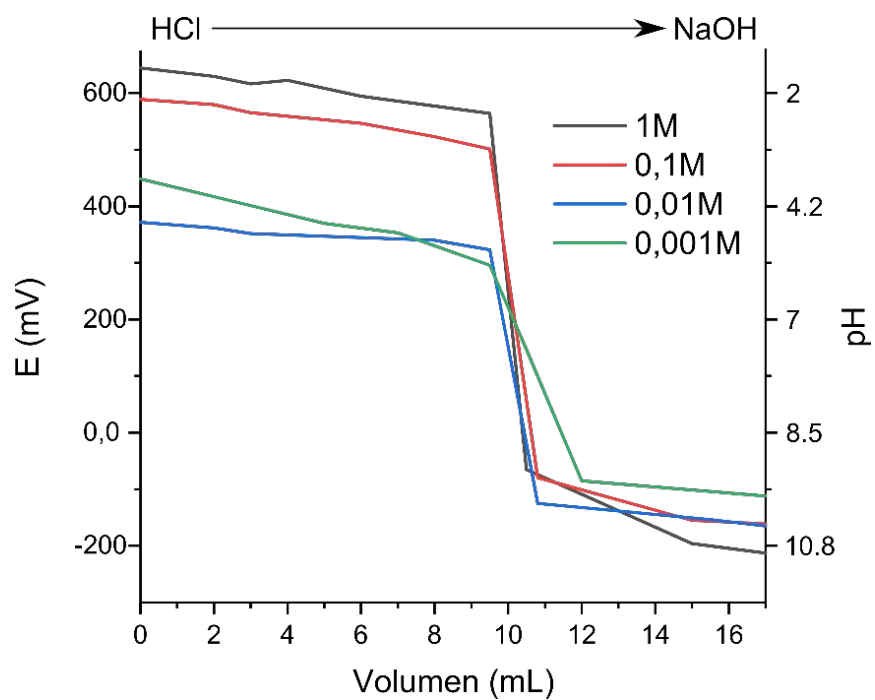

**Figure S11.** Titration of strong acid with strong base: Potentiometric pH titration curves for HCl and NaOH at the indicated molarity

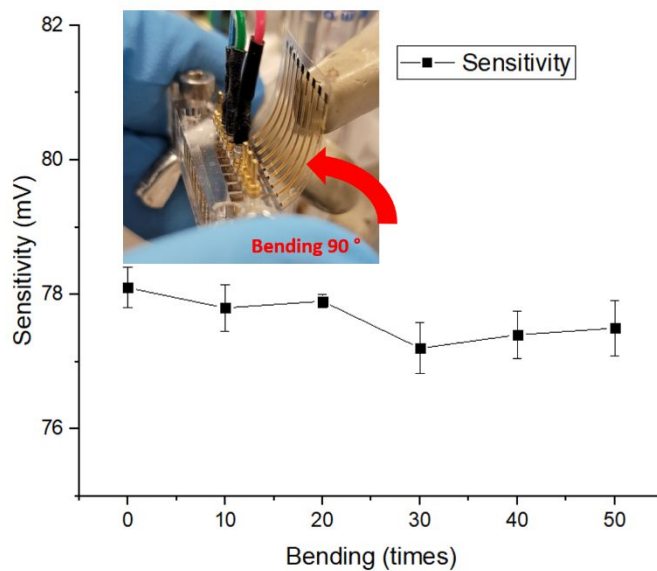

**Figure S12.** Evolution of the pH sensor sensitivity after a simple bending test where the electrode platform is cyclically bended 90 °.

- [1] A. Manzoli, F. M. Shimizu, L. A. Mercante, E. C. Paris, O. N. O. Jr, S. Correa, L. H. C. Mattoso, *Phys. Chem. Chem. Phys.* **2014**, *16*, 24275.
- [2] W. Hu, S. Chen, Z. Yang, L. Liu, H. Wang, *J. Phys. Chem. B* **2011**, 8453.
- [3] J. Y. Lee, J.-W. Lee, C. E. Schmidt, *J. R. Soc. Interface* **2009**, *6*, 801.
- [4] T. Dai, X. Yang, Y. Lu, *Mater. Lett.* **2007**, *61*, 3142.
